# Supplementary material
Source: Springer Nature journal article supplement (https://www.springermedizin.de/resource/supplementary/13017_2012_234_MOESM1_ESM.pdf/9635838)

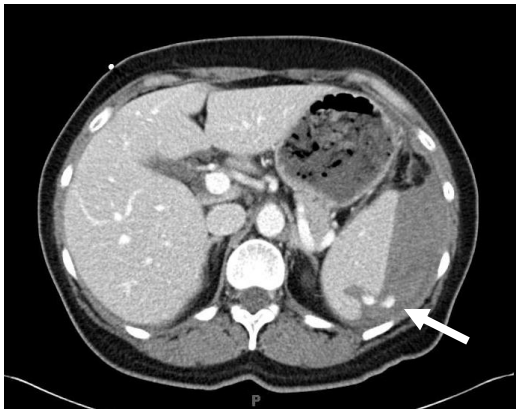

A

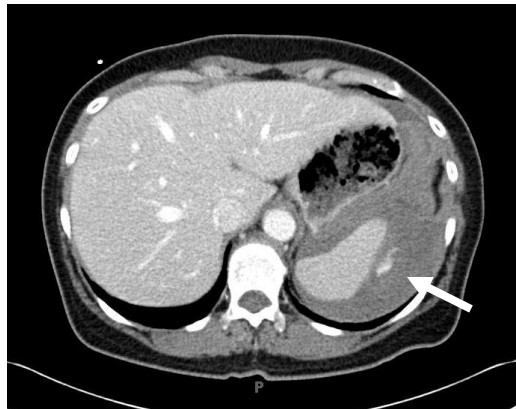

B

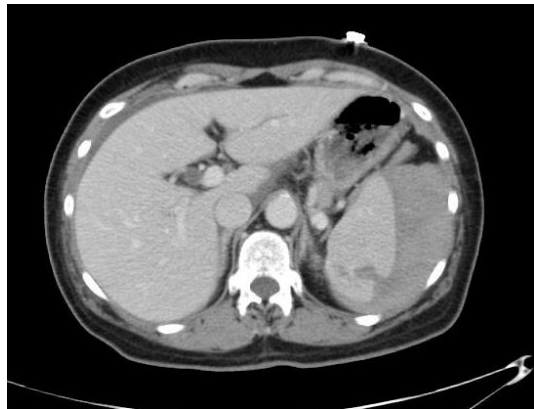

C

Supplement: MOESM1 [file 9635838]
